# Supplementary material
Source: PubMed Central journal article supplement (PMC6381600)

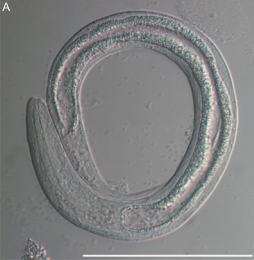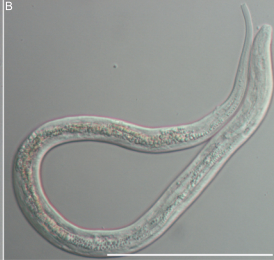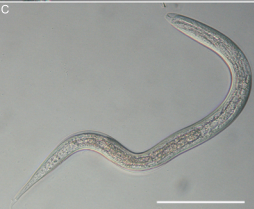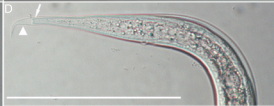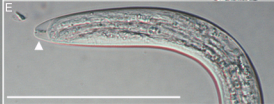

Supplement: NIHMS1002163-supplement-Supplemental_Figure_S1.pdf [file NIHMS1002163-supplement-Supplemental_Figure_S1.pdf]

A

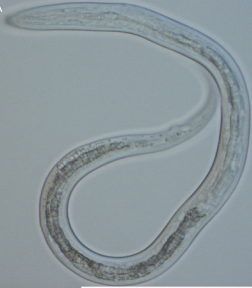

B

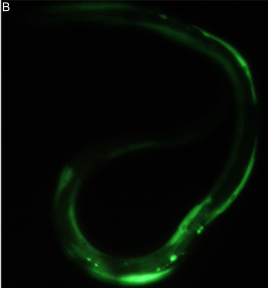

Supplement: NIHMS1002163-supplement-Supplemental_Figure_S2.pdf [file NIHMS1002163-supplement-Supplemental_Figure_S2.pdf]

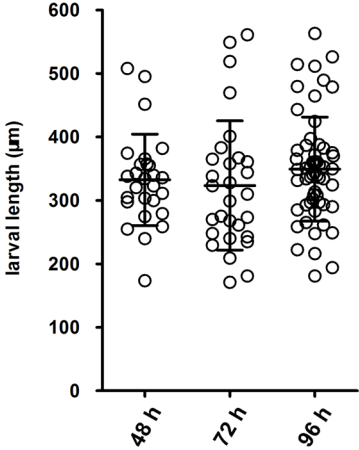

Supplement: NIHMS1002163-supplement-Supplemental_Figure_S3.pdf [file NIHMS1002163-supplement-Supplemental_Figure_S3.pdf]
